# Supplementary material for: Effects of Coronavirus Persistence on the Genome Structure and Subsequent Gene Expression, Pathogenicity and Adaptation Capability
Source: Cells. 2020 Oct 19;9(10):2322. doi: 10.3390/cells9102322 (PMC7589090; doi:10.3390/cells9102322)
Supplement: Supplementary file 1 [file cells-09-02322-s001.pdf]

# Effects of coronavirus persistence on the genome structure and subsequent gene expression, pathogenicity and adaptation capability

Ching-Hung Lin<sup>1</sup>, Cheng-Yao Yang<sup>1</sup>, Meilin Wang<sup>2</sup>, Shan-Chia Ou<sup>3</sup>, Chen-Yu Lo<sup>1</sup>, Tsung-Lin Tsai<sup>1</sup>, Hung-Yi Wu<sup>1\*</sup>

<sup>1</sup> Graduate Institute of Veterinary Pathobiology, College of Veterinary Medicine, National Chung Hsing University, Taichung 40227, Taiwan; [tw23whale@hotmail.com](mailto:tw23whale@hotmail.com) (C.-H.L.); [yangchengyao@nchu.edu.tw](mailto:yangchengyao@nchu.edu.tw) (C.-Y. Y); [axfbji7917@gmail.com](mailto:axfbji7917@gmail.com) (C.-Y.L.); [windtaker10@msn.com](mailto:windtaker10@msn.com) (T.-L.T.)

<sup>2</sup> Department of Microbiology and Immunology, School of Medicine, Chung-Shan Medical University and Clinical Laboratory, Chung-Shan Medical University Hospital, Taichung 40201, Taiwan ; [wml@csmu.edu.tw](mailto:wml@csmu.edu.tw) (M. W.)

<sup>3</sup> Graduate Institute of Microbiology and Public Health, College of Veterinary Medicine, National Chung Hsing University, Taichung 40227, Taiwan; [scou@dragon.nchu.edu.tw](mailto:scou@dragon.nchu.edu.tw) (S.-C.O.)

\* Correspondence; E-Mail: [hwy2@dragon.nchu.edu.tw](mailto:hwy2@dragon.nchu.edu.tw) (H.-Y.W.); Telephone: +886-4-22840369; Fax: +886-4-22862073

Supplementary Figures

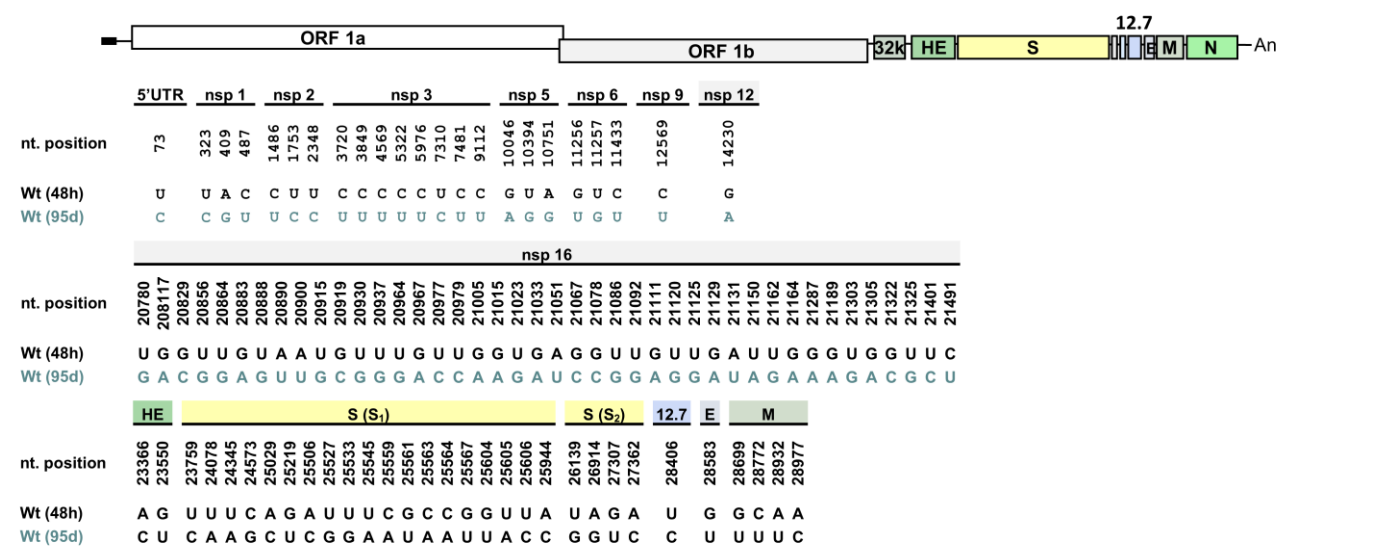

**Figure S1. Linear schematic of BCoV genome showing the location of mutated nts under the selection pressures.** Wt(48h): Viral RNA collected from fresh HRT-18 infected with wt BCoV at 48 hpi. Wt(95d): Viral RNA collected from HRT-18 cells after 95 d of persistent infection with wt BCoV. S<sub>1</sub>: S<sub>1</sub> subunit, S<sub>2</sub>: S<sub>2</sub> subunit.

**A**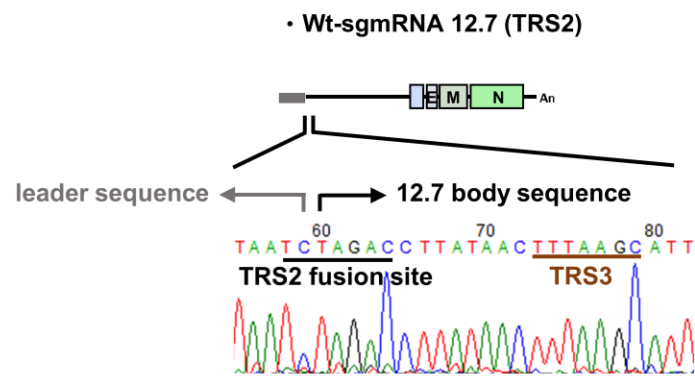**B**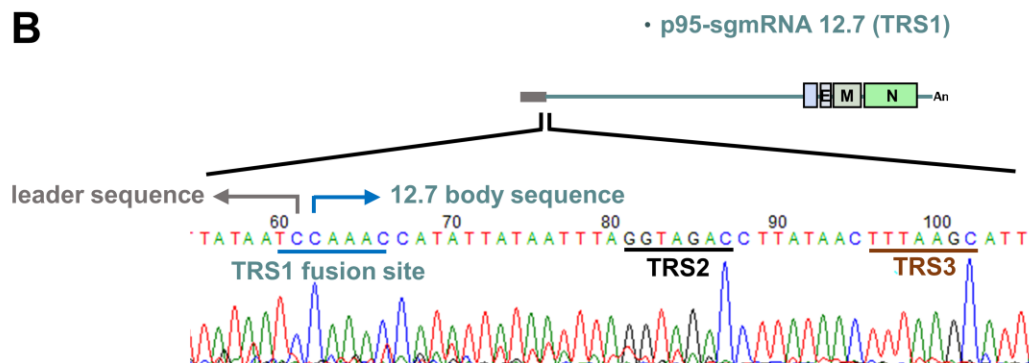

**Figure S2. Sequencing analysis showing the leader-body fusion sites employed for synthesis of sgmRNA 12.7. (A)** SgmRNA 12.7 synthesis (Wt-sgmRNA 12.7) with TRS2 as a leader-body fusion site in HRT-18 cells freshly infected with wt BCoV. **(B)** SgmRNA 12.7 synthesis (p95-sgmRNA 12.7) with TRS1 as a leader-body fusion site in HRT-18 cells with persistent BCoV infection (95 d).

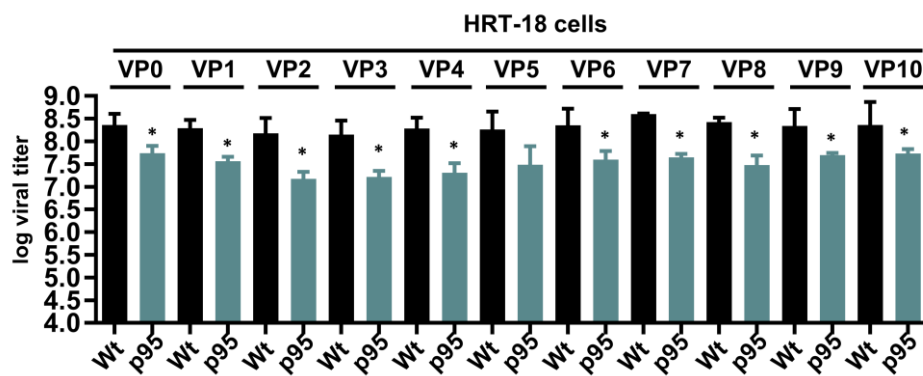

Figure S3. The virus titer of wt BCoV (Wt) and BCoV-p95 (p95) in fresh HRT-18 cells at VP0-VP10 as determined by the plaque assay. The values represent the mean  $\pm$  standard deviation (SD) of three individual experiments. Statistical significance was evaluated using a *t*-test: \* $P < 0.05$ .

**A**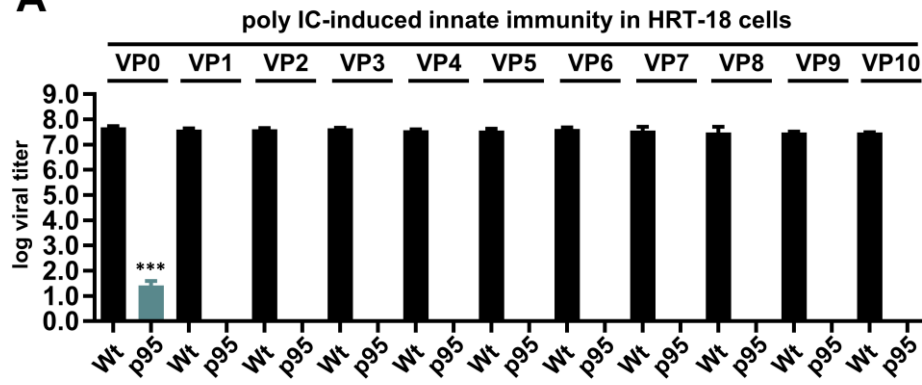**B**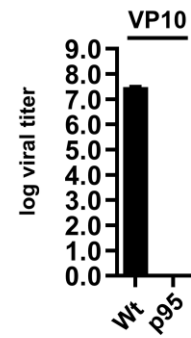

Figure S4. The virus titer of wt BCoV (Wt) and BCoV-p95 (p95) in fresh HRT-18 cells infected with Wt or p95 in the presence of poly IC at VP0-VP10 (A) and at VP10 (B) as determined by the plaque assay. The values represent the mean  $\pm$  standard deviation (SD) of three individual experiments. Statistical significance was evaluated using a *t*-test: \*\*\* $P < 0.001$ .

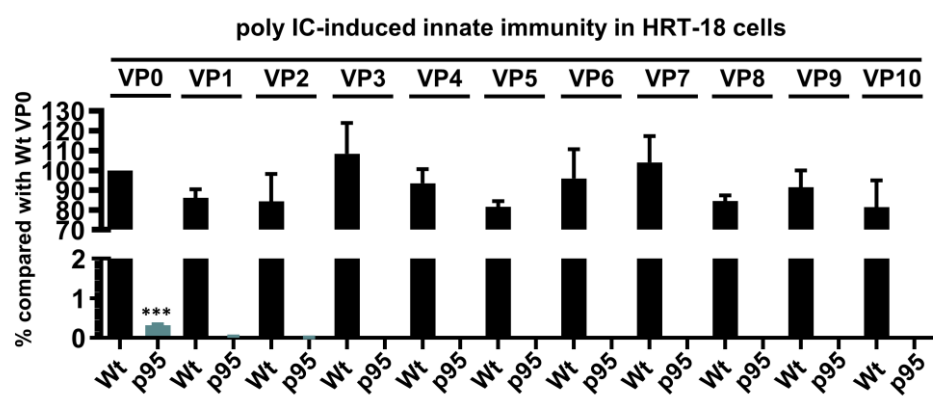

Figure S5. The relative amounts of genome between Wt and p95 from fresh HRT-18 cells infected with Wt or p95 in the presence of poly IC at VP0-VP10 as measured by RT-qPCR. The values represent the mean  $\pm$  standard deviation (SD) of three individual experiments. Statistical significance was evaluated using a *t*-test: \*\*\* $P < 0.001$ .

**A**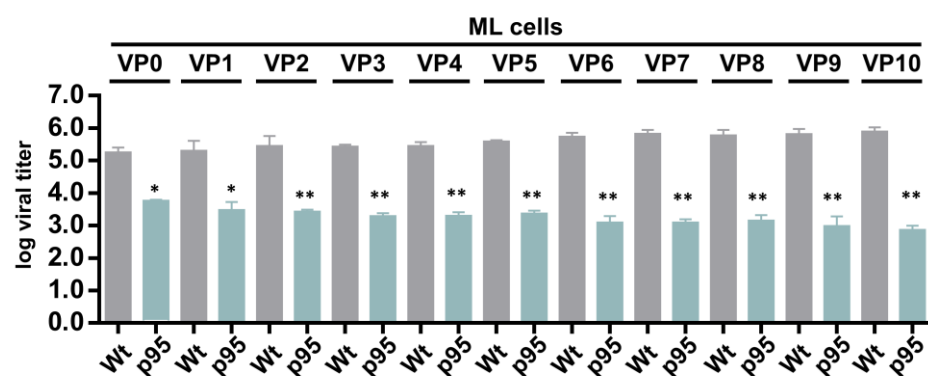**B**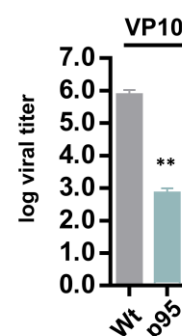

Figure S6. The virus titer of wt BCoV (Wt) and BCoV-p95 (p95) in fresh ML cells infected with Wt or p95 at VP0-VP10 (A) and at VP10 (B) as determined by the plaque assay. The values represent the mean  $\pm$  standard deviation (SD) of three individual experiments. Statistical significance was evaluated using a *t*-test: \*P < 0.05, \*\*P < 0.01.
